# Supplementary material for: Comparisons in temperature and photoperiodic-dependent diapause induction between domestic and wild mulberry silkworms
Source: PubMed Central journal article supplement (PMC8044193; doi:10.1038/s41598-021-87590-4), 2021-04-13
Supplement: 41598_2021_87590_MOESM1_ESM.pdf [file 41598_2021_87590_MOESM1_ESM.pdf]

## Supplementary Table S1

---

### List of primers\*

---

#### a. For cDNA cloning

- |          |                                                                                   |
|----------|-----------------------------------------------------------------------------------|
| 1. DHR   | F: 5'-CGTCACGTAACGTCAACATTCGCGGTACGC-3'<br>R: 5'-TAATTACTTACTAAAACGGAATGTATTTG-3' |
| 2. TRPA1 | F: 5'-GTCATGACATTTGTGGAACAACGGCCTA-3'<br>R: 5'-TCAAGTCGACTTGTAAATGATGCAGCTCG-3'   |
- 

#### b. For screening of the $\Delta TRPA1$ mutant

- |  |                                                                            |
|--|----------------------------------------------------------------------------|
|  | F: 5'-AGTTTTTTGTACAGGCTGCTGAAAGCGGA-3'<br>R: 5'-TCTCGGTTGCATCGCCAATAAGC-3' |
|--|----------------------------------------------------------------------------|
- 

\*F; Forward primer, R; Reverse primer.

**a**

```

BmoDH; TDMKDESDRGAHSERGA LWFGPRL 24
BmaDH; TDMKDESDRGAHSERGA LWFGPRL 24
*****

```

**b**

```

                                     TM1
BmoDHR; MNS--ETINDTANASRPVDSTRVFGPQRDTLYIVLPITIIYTFIFVSGLLGNIPTCIVV 58
BmaDHR; MNSLNETLNDTANASRPVDSTRVFGPQRDTLYIVLPITIIYTFIFISGLLGNIFTCIVV 60
*****

          TM2                                TM3
BmoDHR; RNKNLHTATNYLFLSLAISDLLLVSGMPQEMYSIWSKWPYVFGHTFCVIRGLAAETSTN 118
BmaDHR; RNKNLHTATNYLFLSLAISDLLLVSGMPQEMYSIWSKWPYVFGHTFCVIRGLAAETSTN 120
*****

                                     TM4
BmoDHR; ASVLTITLFTIERYLAICHFPVSHKMSKLSRAVKHVLLWVAALALALPQALQFGIRQYQ 178
BmaDHR; ASVLTITLFTIERYLAICHFPVSHKMSKLSRAVKHVLLWVAALALALPQALQFGIRQYQ 180
*****

          TM5
BmoDHR; GVIMCLQTRVIEHSFEISTFVFLAPMVLITVLYSFIGLKLREKSNVKEQNQDFESSI 238
BmaDHR; GVIMCLQTRVIEHSFEISTFVFLAPMVLITVLYSFIGLKLREKSNVKEQNQDFESSI 240
*****

          TM6
BmoDHR; RYSHKMRKPSQSTRRVIKMLVAVVVAFFICWAPFHAQRLVAIYGTNENHLAKSPILFSV 298
BmaDHR; RYSHKMRKPSQSTRRVIKMLVAVVVAFFICWAPFHAQRLVAIYGTNENHLAKSPILFSV 300
*****

          TM7
BmoDHR; YLFLTYISGIFYYMSTCINPILYHIMSNKFRDAFKMTLCCGTRNDTAVKRSSYTAMAFV 358
BmaDHR; YLFLTYISGICYMSTCINPILYHIMSNKFRDAFKMTLCCGTRNDTAVKRSSYTAMAFV 360
*****

BmoDHR; RHPTSSGTSNSGNSIRNETNLQSKTRTRTNGRDKILNDAHVCNGTLSSAAVGKPDSTRNG 418
BmaDHR; RNPTSSGTSNSGNSIRNETNLQSKTRTRTNSRDKILNDAHVCNGTLSSAAVGKPDSTRNG 420
* *****

BmoDHR; DRPLDRNLINETYFNTNC 436
BmaDHR; DRPLDRNLINETYFNTNC 438
*****

```

**Supplementary Figure S1.** Alignments of amino acid sequences of diapause hormone (DH) and DH receptor (DHR). The deduced amino acid sequences of *DH-PBAN* (a) and *DHR* (Acc. No. LC594680) (b) cDNAs in *Bombyx mori* (Bmo) and *B. mandarina* (Bma) were aligned. Identical amino acids are indicated by asterisks. The putative transmembrane domains (TM1~TM7) are indicated.
